# Supplementary material
Source: PubMed Central journal article supplement (PMC7048263)
Supplement: MCB.00467-19-s0003.pdf [file MCB.00467-19-s0003.pdf]

**Supplemental Table 1. Primers for qPCR.**

| <i>Gene Symbol</i>      | Forward/<br>Reverse/<br>Probe | Sequence                           |
|-------------------------|-------------------------------|------------------------------------|
| <i>Actb</i><br>Primer 1 | Forward                       | 5'-CGGTTCCGATGCCCTGAGGCTCTT-3'     |
|                         | Reverse                       | 5'-CGTCACACTTCATGATGGAATTGA-3'     |
| <i>Actb</i><br>Primer 2 | Forward                       | 5'-GAACCCTAAGGCCAACCGTG-3'         |
|                         | Reverse                       | 5'-CAGAGGCATACAGGGACAGC-3'         |
| <i>Cst7</i>             | Forward                       | 5'-ATGTCAGCAAAGCCCTGGTA-3'         |
|                         | Reverse                       | 5'-GGTCTTCCTGCATGTAGTTCG-3'        |
| <i>Cx3cr1</i>           | Forward                       | 5'-GGCCTAGAGCTCAAAGAAATCC-3'       |
|                         | Reverse                       | 5'-CACAGACCTTCGATCCCAGT-3'         |
| <i>Gclc</i>             | Forward                       | 5'-ATCTGCAAAGGCGGCAAC-3'           |
|                         | Reverse                       | 5'-ACTCCTCTGCAGCTGGCTC-3'          |
|                         | Probe                         | 5'-ACGGGTGCAGCAAGGCCCA-3'          |
| <i>Gclm</i>             | Forward                       | 5'-TGGAGCAGCTGTATCAGTGG-3'         |
|                         | Reverse                       | 5'-AAATCTGGTGGCATCACACA-3'         |
| <i>Gfap</i>             | Forward                       | 5'-TCGAGATCGCCACCTACAG-3'          |
|                         | Reverse                       | 5'-GTCTGTACAGGAATGGTGATGC-3'       |
| <i>Gsr</i>              | Forward                       | 5'-GGCGTGGAGGTGTTGAAG-3'           |
|                         | Reverse                       | 5'-GCACGGAAGTCACCACTTG-3'          |
| <i>Iba1</i>             | Forward                       | 5'-GGATTTGCAGGGAGGAAAAG-3'         |
|                         | Reverse                       | 5'-TGGGATCATCGAGGAATTG-3'          |
| <i>Il1b</i>             | Forward                       | 5'-TGCCACCTTTTGACAGTGATG-3'        |
|                         | Reverse                       | 5'-TGATGTGCTGCTGCGAGATT-3'         |
| <i>Il6</i>              | Forward                       | 5'-CTGCAAGAGACTTCCATCCAG-3'        |
|                         | Reverse                       | 5'-AGTGGTATAGACAGGTCTGTTGG-3'      |
| <i>Itgax</i>            | Forward                       | 5'-TCGTATTTGGCTTCCCAGAC-3'         |
|                         | Reverse                       | 5'-CCATCATTAGACACCGTCACAT-3'       |
| <i>Keap1</i>            | Forward                       | 5'-CCCATGAGGCATCACCGTAG-3'         |
|                         | Reverse                       | 5'-CATAGCCTCCGAGGACGTAG-3'         |
|                         | Probe                         | 5'-GGACTACTGTGCACCAGGGCAAG-3'      |
| <i>Nos2</i>             | Forward                       | 5'-GTTCTCAGCCCAACAATAACAAGA-3'     |
|                         | Reverse                       | 5'-GTGGACGGGTTCGATGTCAC-3'         |
| <i>Nqo1</i>             | Forward                       | 5'-AGCTGGAAGCTGCAGACCTG-3'         |
|                         | Reverse                       | 5'-CCTTTCAGAATGGCTGGCA-3'          |
|                         | Probe                         | 5'-ATTTTCAGTTCCCATTCAGTGGTTTGGG-3' |
| <i>P2ry12</i>           | Forward                       | 5'-CCCGGAGACACTCATATCCTT-3'        |
|                         | Reverse                       | 5'-GTCCCAGGGGAGAAGGTG-3'           |

| <i>Gene Symbol</i> | Forward/<br>Reverse/<br>Probe | Sequence                     |
|--------------------|-------------------------------|------------------------------|
| <i>Ptgs2</i>       | Forward                       | 5'-TTCAACACACTCTATCACTGGC-3' |
|                    | Reverse                       | 5'-AGAAGCGTTTGCGGTAATCAT-3'  |
| <i>Trem2</i>       | Forward                       | 5'-AGGGCCCATGCCAGCGTGTGGT-3' |
|                    | Reverse                       | 5'-CCAGAGATCTCCAGCATC-3'     |
| <i>Tyrobp</i>      | Forward                       | 5'-TGGTGTTGACTCTGCTGATTG-3'  |
|                    | Reverse                       | 5'-GTCTCAGCAATGTGTTGTTCC-3'  |
